# Supplementary material
Source: publisher figshare collection journal article supplement (https://gsajournals.figshare.com/ndownloader/files/26180171)
Supplement: Supplementary file 1 [file 26180171]

## Sheet: Sheet1
Data type	Experimental species	Symbol/name used in publication	Source – public	Source – published	Source – unpublished	Identifiers	New reagent	Comments
Data type (mandatory) Duplicate rows as needed. Order is flexible, but row titles must be preserved.	Experimental species (mandatory, "NA" okay)	Symbol/name used in publication (mandatory)	Source – public [stock center; company, data repository] (one of D,E,F mandatory)	Source -- published [PMID or 'this paper'] (one of D,E,F mandatory)	Source – unpublished [description, incl. lab of origin] (one of D,E,F mandatory)	Identifiers [format as ID_source:identifier] Separate multiple entries with semi-colon, space	New reagent (mandatory for new entities) Description, progenitor(s)	Comments (optional) Genotypes, purpose of reagent, additional information
gene (source not applicable)			NA	NA	NA
strain, strain_background	S. cerevisiae	YPS1009	Sniegowski collectin	Sniegowski, P. D., P. G. Dombrowski and E. Fingerman, 2002. Saccharomyces cerevisiaeand Saccharomyces paradoxus coexist in a natural woodland site in North America and display different levels of reproductive isolation from European conspecifics. FEMS Yeast Res. 1: 299–306.	NA
strain, strain_background	S. cerevisiae	NCYC110	NCYC National Yeast Colleciton	Liti et al. Nature. 2009 Mar 19;458(7236):337-41.	NA
genetic reagent (in whole organism)
cell line
transfected construct (in cell line)
antibody
recombinant DNA reagent	NA	pJH1		Hose et al. 2020.Jan 7;9:e52063. doi: 10.7554/eLife.52063.				empty vector
recombinant DNA reagent	NA	pJH1_SSD1-YPS1009		Hose et al. 2020.Jan 7;9:e52063. doi: 10.7554/eLife.52063.				vector expressing YPS1009 allele of SSD1 as published in Hose et al. 2020
recombinant DNA reagent	NA	pJH1_SSD1-BY4741			this study			vector expressing BY4741 (S288c) allele of SSD1
recombinant DNA reagent	NA	pJH1_SSD1-YPS1009-S1190G, A1196P			this study			pJH1_SSD1-YPS1009 in which Serine at 1190 and Alanine at 1196 were changed to Glycine and Proline at those positions, respectively, as described.
sequence-based reagent
peptide, recombinant protein
large-scale dataset	S. cerevisiae	1011 strains	Peter et al. Nature. 2018 Apr;556(7701):339-344. doi:	Peter et al. Nature. 2018 Apr;556(7701):339-344. doi:	NA
commercial assay	NA
chemical compound, drug	NA
software, algorithm	NA
other
